# Supplementary material
Source: Elsevier journal article supplement (https://www.sciencedirect.com/science/article/pii/S2530064420300638)
Supplement: mmc1 [file S2530064420300638:mmc1.pdf]

**Supplementary material for Fernandes et al., 2020 – Portuguese version of the original article.**

Cite este artigo como:

Fernandes, G.W., et al. Biodiversity and ecosystem services in the Campo Rupestre: a road map for the sustainability of the hottest Brazilian biodiversity hotspot. *Perspect Ecol Conserv.* (2020). <https://doi.org/10.1016/j.pecon.2020.10.004>

**Título: Biodiversidade e serviços ecossistêmicos no Campo Rupestre: um roteiro para a sustentabilidade do *hotspot* brasileiro mais ameaçado**

**Título resumido: Plano de ação embasado em evidências científicas para o Campo Rupestre**

G. Wilson Fernandes<sup>1\*</sup>, Lucas Arantes-Garcia<sup>1</sup>, Milton Barbosa<sup>1</sup>, Newton P. U. Barbosa<sup>2</sup>, Eugênia K.L. Batista<sup>1,3</sup>, Wallace Beiroz<sup>1,4</sup>, Fernando M. Resende<sup>1</sup>, Anna Abrahão<sup>5,6</sup>, Emmanuel D. Almada<sup>7</sup>, Elaine Alves<sup>8</sup>, Natacha J. Alves<sup>9</sup>, Patrícia Angrisano<sup>1</sup>, Montserrat Arista<sup>10</sup>, Juan Arroyo<sup>10</sup>, André Jardim Arruda<sup>11</sup>, Thaise de Oliveira Bahia<sup>12</sup>, Laura Braga<sup>12</sup>, Lílían Brito<sup>13</sup>, Marcos Callisto<sup>14</sup>, Dario Caminha Paiva<sup>1</sup>, Marília Carvalho<sup>15</sup>, Abel Augusto Conceição<sup>16</sup>, Leda N. Costa<sup>1</sup>, Antonio Cruz<sup>17</sup>, Jessica Cunha-Blum<sup>1</sup>, John Dagevos<sup>18</sup>, Bráulio F.S. Dias<sup>19</sup>, Victor D. Pinto<sup>20</sup>, Rodolfo Dirzo<sup>21</sup>, Daniel Quedes Domingos<sup>22</sup>, Livia Echternacht<sup>23</sup>, Stephannie Fernandes<sup>24</sup>, Jose Eugenio C. Figueira<sup>3</sup>, Cecilia F. Fiorini<sup>25</sup>, Ana Maria Giulietti<sup>16</sup>, Augusto Gomes<sup>26</sup>, Vanessa M. Gomes<sup>1</sup>, Bernardo Gontijo<sup>27</sup>, Fernando Goulart<sup>28</sup>, Tadeu J. Guerra<sup>29</sup>, Patrícia A. Junqueira<sup>30</sup>, Débora Lima-Santos<sup>1</sup>, Julia Marques<sup>31</sup>, Joao Meira-Neto<sup>32</sup>, Deise T. B.

*G.W. Fernandes et al. 2020 / Perspectives in Ecology and Conservation*

Miola<sup>33,34</sup>, Leonor Patrícia C. Morellato<sup>35</sup>, Daniel Negreiros<sup>36</sup>, Elizabeth Neire<sup>15,37</sup>, Ana Carolina Neves<sup>1</sup>, Frederico S. Neves<sup>38</sup>, Samuel Novais<sup>1</sup>, Yumi Oki<sup>1</sup>, Elizabeth Oliveira, Rafael S. Oliveira<sup>5</sup>, Marco O. Pivari<sup>39</sup>, Euripedes Pontes Junior<sup>40</sup>, Bernardo D. Ranieri<sup>41</sup>, Rodrigo Pinheiro Ribas<sup>42</sup>, Aldicir Scariot<sup>43</sup>, Carlos E. Schaefer<sup>15</sup>, Letícia Sena<sup>1</sup>, Pedro G. da Silva<sup>44</sup>, Paulo R. Siqueira<sup>38</sup>, Natalia C. Soares<sup>35</sup>, Britaldo Soares-Filho<sup>45</sup>, Ricardo Solar<sup>33</sup>, Marcelo Tabarelli<sup>46</sup>, Rogério Vasconcellos<sup>47</sup>, Evaldo Vilela<sup>48</sup>, Fernando A. O. Silveira<sup>33</sup>

1. Lab. de Ecologia Evolutiva e Biodiversidade, Dept. de Genética, Ecologia e Evolução/ICB, Universidade Federal de Minas Gerais (UFMG), Belo Horizonte, MG, Brasil.
2. Centro de Bioengenharia de Espécies Invasoras (CBEIH), Belo Horizonte, MG, Brasil.
3. Lab. de Ecologia de Populações, Dept. de Genética, Ecologia e Evolução/ICB, Universidade Federal de Minas Gerais (UFMG), Belo Horizonte, MG, Brasil.
4. Instituto de Estudos do Xingu, Universidade Federal do Sul e Sudeste do Pará, São Félix do Xingu, PA, Brasil.
5. Lab. de Ecologia Funcional de Plantas, Dept. de Biologia Vegetal, Universidade Estadual de Campinas (UNICAMP), Campinas, SP, Brasil.
6. Institute of Soil Science and Land Evaluation, University of Hohenheim, Stuttgart, Germany.
7. Kaipora - Laboratório de Estudos Bioculturais - Universidade do Estado de Minas Gerais (UEMG), Ibirité, MG, Brasil.
8. Simetria Meio Ambiente e Engenharia, Belo Horizonte, MG, Brasil.
9. Universidade Federal de Ouro Preto (UFOP), Ouro Preto, MG, Brasil.
10. Dept. of Plant Biology and Ecology, University of Seville, Spain.
11. School of Biological Sciences, University of Western Australia, Perth, WA, Australia.
12. Dept. de Biodiversidade Evolução e Meio Ambiente, Universidade Federal de Ouro Preto (UFOP), Ouro Preto, MG, Brasil.

*G.W. Fernandes et al. 2020 / Perspectives in Ecology and Conservation*

13. Instituto Federal de Educação, Ciência e Tecnologia do Norte de Minas Gerais (IFNMG), Salinas, MG, Brasil.
14. Lab. de Ecologia de Bentos, Dept. de Genética, Ecologia e Evolução/ICB, Universidade Federal de Minas Gerais (UFMG), Belo Horizonte, MG, Brasil.
15. Dept. de Solos e Nutrição de Plantas, Universidade Federal de Viçosa (UFV), Viçosa, MG, Brasil.
16. Dept. de Ciências Biológicas, Universidade Estadual de Feira de Santana (UEFS), Feira de Santana, BA, Brasil.
17. Lab. de Herpetologia, Dept. de Genética, Ecologia e Evolução/ICB, Universidade Federal de Minas Gerais (UFMG), Belo Horizonte, MG, Brasil.
18. Telos, Brabant Centre for Sustainable Development, Tilburg University, Tilburg, The Netherlands.
19. Dpto. de Ecologia, Universidade de Brasília (UnB), Brasília, DF, Brasil.
20. Dpto. de Biologia Geral, Universidade Federal de Viçosa (UFV), Viçosa, MG, Brasil.
21. Dept. of Biology and Woods Institute for the Environment, Stanford University, Stanford, CA, USA.
22. Dpto. de Biologia, Universidade Federal de Lavras (UFLA), Lavras, MG, Brasil.
23. Lab. de Sistemática Vegetal, Depto. de Biodiversidade, Evolução e Meio Ambiente, Universidade Federal de Ouro Preto (UFOP), Ouro Preto, MG, Brasil.
24. School of Earth and Sustainability, Northern Arizona University, Flagstaff, AZ, USA.
25. Lab. de Biosistemática e Sistemática Molecular de Plantas, Dept. de Botânica/ICB, Universidade Federal de Minas Gerais (UFMG), Belo Horizonte, MG, Brasil.
26. Independent Environmental Consultant and Nature Photographer, Andirá Imagens, Brasil.
27. Lab. de Biogeografia e Climatologia, Dept. de Geografia/IGC, Universidade Federal de Minas Gerais (UFMG), Belo Horizonte, MG, Brasil.
28. Centro de Desenvolvimento Sustentável, Universidade de Brasília, Brasília, DF, Brasil.
29. Lab. de Ecologia e Evolução de Plantas Tropicais, Dept. de Botânica, Universidade Federal de Minas Gerais (UFMG), Belo Horizonte, MG, Brasil.
30. Dept. de Botânica/ICB, Universidade Federal de Minas Gerais (UFMG), Belo Horizonte, MG, Brasil.

*G.W. Fernandes et al. 2020 / Perspectives in Ecology and Conservation*

31. Lab. de Ecofisiologia Vegetal, Dept. de Biodiversidade, Evolução e Meio Ambiente/ICEB, Universidade Federal de Ouro Preto (UFOP), Ouro Preto, MG, Brasil.
32. Lab. de Ecologia e Evolução de Plantas, Depto. de Biologia Vegetal, Universidade Federal de Viçosa (UFV), Viçosa, MG, Brasil.
33. Centro de Síntese Ecológica e Conservação, Dept. de Genética, Ecologia e Evolução/ICB, Universidade Federal de Minas Gerais (UFMG), Belo Horizonte, MG, Brasil.
34. Artemis Ambiental, Pará de Minas, MG, Brasil.
35. Lab. de Fenologia, Instituto de Biociências, Universidade Estadual Paulista (UNESP), Rio Claro, SP, Brasil.
36. Instituto de Ciências Biológicas e Saúde, Centro Universitário UNA, Belo Horizonte, MG, Brasil.
37. Agroflor Engenharia e Meio Ambiente, Viçosa, MG, Brasil.
38. Lab. de Ecologia de Insetos (LEI), Dept. de Genética, Ecologia e Evolução/ICB, Universidade Federal de Minas Gerais (UFMG), Belo Horizonte, MG, Brasil.
39. Bioma Meio Ambiente, Nova Lima, MG, Brasil.
40. Instituto Chico Mendes de Conservação da Biodiversidade (ICMBio), Belo Horizonte, MG, Brasil.
41. Norman B. Keevil Institute of Mining Engineering, University of British Columbia (UBC), Vancouver, BC, Canada.
42. Lab. de Cartografia, Dept. de Geografia, Universidade do Estado de Santa Catarina (UESC), Florianópolis, SC, Brasil.
43. Embrapa Recursos Genéticos e Biotecnologia (EMBRAPA), Brasília, DF, Brasil.
44. Dept. de Genética, Ecologia e Evolução/ICB, Universidade Federal de Minas Gerais (UFMG), Belo Horizonte, MG, Brasil.
45. Dept. de Cartografia/IGC, Universidade Federal de Minas Gerais (UFMG), Belo Horizonte, MG, Brasil.
46. Centro de Ciências Biológicas, Dept. de Botânica, Universidade Federal de Pernambuco, Recife, PE, Brasil.

*G.W. Fernandes et al. 2020 / Perspectives in Ecology and Conservation*

47. Anglo-American, Belo Horizonte, MG, Brasil.

48. Dept. de Biologia Animal, Entomologia. Universidade Federal de Viçosa (UFV), Viçosa, MG, Brasil.

\*Autor para correspondência.

## Destaques

- Campo Rupestre (CR) ocorre no ecótono dos *hotspots* de biodiversidade Cerrado-Mata Atlântica.
- CR epitomiza os conflitos entre modelos socioeconômicos exploratórios e sustentáveis.
- Propomos e descrevemos o Plano de Ação para o Campo Rupestre (PACR).
- O PACR visa conciliar os valores socioeconômicos e ambientais no CR.

## Resumo gráfico

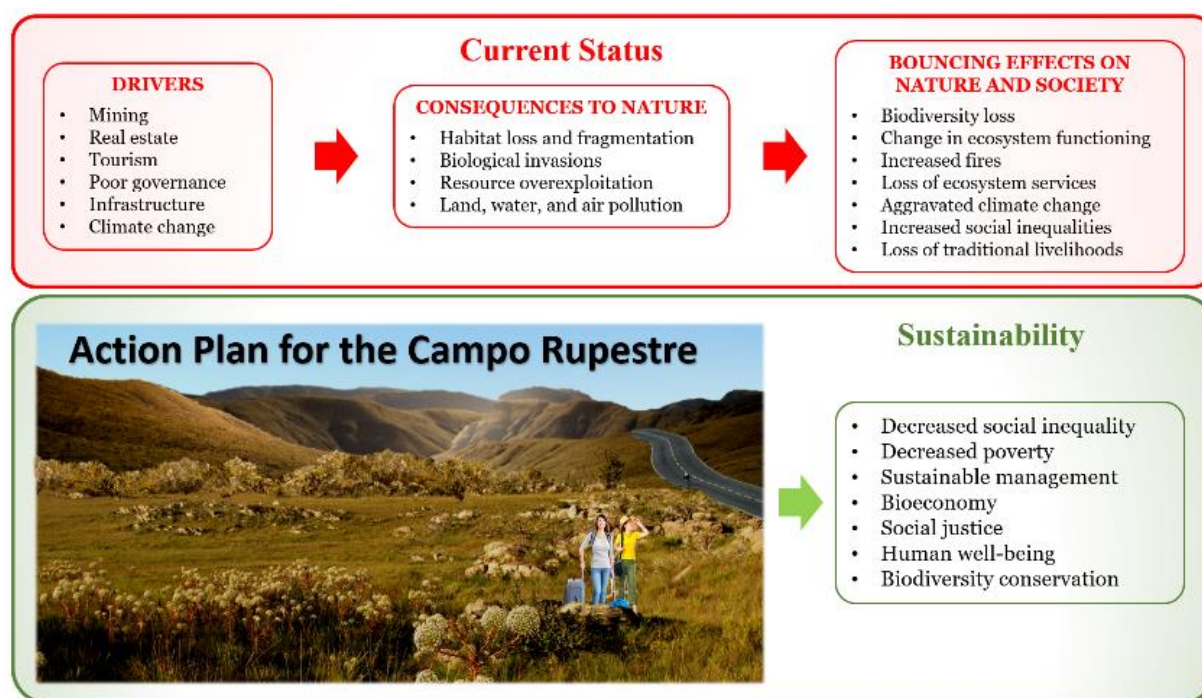

## **Resumo**

A sustentabilidade global se baseia em uma miríade de benefícios fornecidos pelos ecossistemas naturais que sustentam o meio de vida e bem-estar humano, desde a sobrevivência da biodiversidade até a regulação do clima. A inegável importância da conservação das florestas tropicais atraiu para si a maior parte dos esforços de conservação. Entretanto, ecossistemas abertos, como o Campo Rupestre, têm sido historicamente negligenciados, apesar de sua alta diversidade de espécies e dos importantes serviços ecossistêmicos a ele associados. Destacamos aqui as principais e atuais ameaças à conservação do Campo Rupestre, enfatizando sua importância ecológica, social, cultural, geoambiental e econômica. Destacamos a importância do Campo Rupestre como um reservatório de biodiversidade e serviços ecossistêmicos e oferecemos ações prioritárias para sua conservação que resultaram de discussões envolvendo cientistas, representantes da indústria, gestores ambientais e demais membros da sociedade civil. As ações propostas incluem esforços relacionados à restauração ecológica, ecoturismo sustentável, proteção do conhecimento ecológico tradicional, identificação de lacunas de conhecimento e desenvolvimento de políticas públicas específicas. Tais questões foram estruturadas coletivamente em um modelo conceitual que representa um roteiro para o futuro do Campo Rupestre buscando um distanciamento da superexploração histórica em direção a uma gestão sustentável. Proteger o futuro de ecossistemas não florestais como o Campo Rupestre representa um desafio para os paradigmas atuais de conservação da natureza. Ao estabelecer prioridades e diretrizes, nós propomos um plano de ação para dar suporte a uma política de tomada de decisões para o uso sustentável do Campo Rupestre com respaldo científico.

**Palavras-chave:** Bioeconomia; Campo Rupestre; Conservação da Biodiversidade; Ecologia de Montanhas; Mudanças Globais; Política.

## **Introdução**

Indubitavelmente, os benefícios fornecidos pelos ecossistemas naturais, como a regulação do clima, a segurança alimentar e o abastecimento de água representam um ativo fundamental da teoria e da prática da Conservação (Pascual et al., 2017; Díaz et al., 2019). Embora as florestas tropicais tenham uma maior visibilidade em relação às práticas de conservação, principalmente devido à sua alta biodiversidade e potencial de sequestro de carbono, há uma necessidade crescente pela valorização da biodiversidade e dos serviços ecossistêmicos de outros sistemas tropicais (Overbeck et al., 2015; Veldman et al., 2015; Fernandes 2016a). Milhões de pessoas no Brasil e em todo o mundo dependem direta ou indiretamente dos serviços ambientais oferecidos por ecossistemas não florestais, como savanas e pastagens (Fernandes et al., 2018; Bond, 2019). No presente estudo, nós nos concentramos em estabelecer uma estratégia de conservação integrativa para o Campo Rupestre, um ecossistema mega diverso, fornecedor de serviços essenciais e que está altamente ameaçado pelos atuais modelos de exploração (Fernandes 2016a; Fernandes et al., 2018). Caso essas ações para minimizar as ameaças ao Campo Rupestre não sejam tomadas imediatamente são esperadas grandes perdas para o ecossistema nas próximas décadas (Fernandes et al., 2018). Nosso objetivo é fornecer um plano de ação orientado para guiar o futuro do Campo Rupestre em direção a um uso mais sustentável. Para isso, primeiramente delineamos o estado da biodiversidade e da conservação deste ecossistema e analisamos a inter-relação entre características abióticas e bióticas, além das atuais ameaças antrópicas enfrentadas neste ambiente. Posteriormente, elaboramos um modelo conceitual para promover o uso sustentável do Campo Rupestre. Por fim, elencamos uma série de ações que consideramos imprescindíveis para a construção de uma Aliança para a Promoção da Sustentabilidade do Campo Rupestre.



## **A importância local e global da biodiversidade e serviços ecossistêmicos do Campo**

### **Rupestre**

O Campo Rupestre é caracterizado por um mosaico de habitats de vegetação aberta. Essa vegetação varia desde campos naturais propensos a incêndios e formações savânicas misturados com arbustos ericóides até fisionomias de topos de montanhas associados, principalmente, às formações geológicas pré-Cambrianas extremamente empobrecidas como quartzitos, metarenitos e afloramentos ferruginosos (Fig. 1; Fernandes, 2016a). O Campo Rupestre ocorre em paisagens montanhosas com formações geológicas antigas, compostas por núcleos residuais de massas de terra altamente intemperizados, dobrados, erodidos e com falhas geológicas que foram posteriormente submetidos ao soerguimento regional por eventos tectônicos de baixa magnitude (Schaefer et al., 2016). O Campo Rupestre está principalmente associado à Cadeia do Espinhaço, que compreende o ecótono do Cerrado, Mata Atlântica e Caatinga. Outras áreas menores e disjuntas de Campo Rupestre estão distribuídas de forma irregular pelos estados de Minas Gerais, Bahia e Goiás (Alves & Kolbek, 1994; Giuliatti et al., 1997, Vasconcelos, 2011), na floresta amazônica, incluindo a Serra dos Carajás e os tepuis, e em montanhas isoladas no extremo oeste (Corumbá, Serra Ricardo Franco) e no nordeste do Brasil (Fig. 2; Barbosa & Fernandes, 2016; Mota et al., 2018; Mattos et al., 2019; Zappi et al., 2019). A distribuição azonal, semelhante a um arquipélago, das áreas de ocorrência do Campo Rupestre criou ilhas do céu (ilhas em elevadas altitudes isoladas por uma matriz contínua de vegetação de planície) (Coelho et. al., 2018), que promoveram uma rápida diversificação de espécies durante o Pleistoceno (Vasconcelos et al., 2020). O isolamento de longo prazo das populações e espécies decorrente do padrão de ilha do céu (ver De Bano et al., 1995) facilitou a especiação alopátrica

resultando na maior taxa de endemismo entre os tipos de fitofisionomias brasileiras (mais de 40% das espécies de plantas vasculares), com um alto *turnover* de espécies entre áreas (Echternacht et al., 2011; Neves et al., 2018; Colli-Silva et al., 2019; Mattos et al., 2019). O Campo Rupestre ocupa uma área menor do que 0,8% do território brasileiro, mas abriga mais de 15% de sua diversidade de flora (Silveira et al., 2016). Em conjunto, esses dados sugerem que este ecossistema é o *hotspot* de biodiversidade mais criticamente ameaçado do Brasil (Fernandes et al., 2014, 2018a).

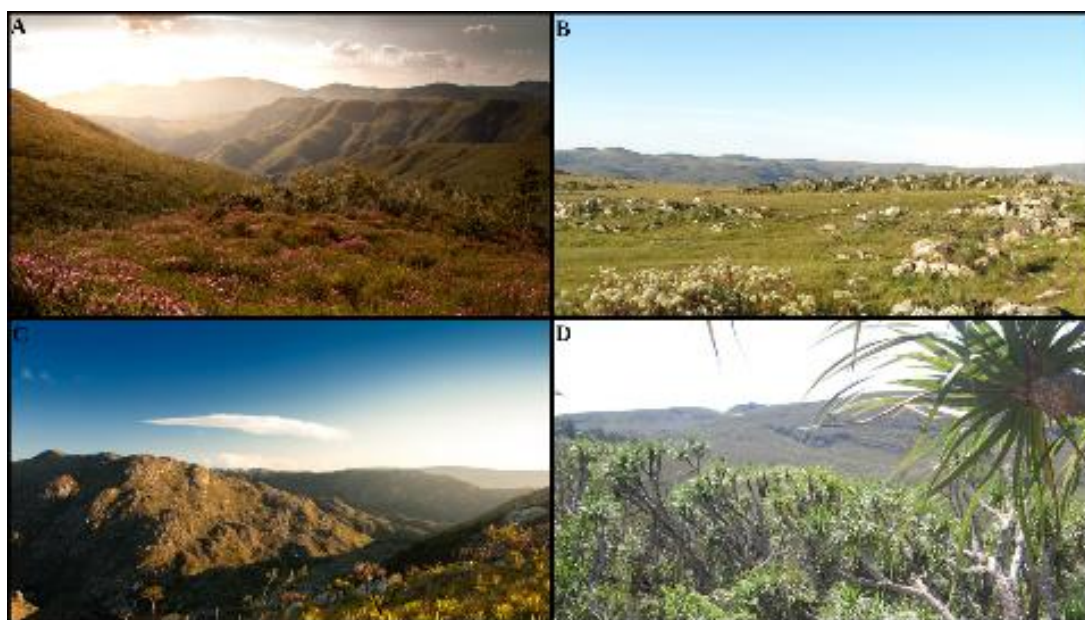

Figura 1. Paisagem e vegetação típica do Campo Rupestre. **A** Uma visão ampla do Campo Rupestre mostrando comunidades arbustivas e herbáceas em um habitat rochoso. **B** Campos extensos com afloramentos rochosos dominados por *Actinocephalus bongardii* em flor. **C** Habitat de solo quartzítico imerso em uma matriz de campos arenosos e rochosos. **D** Entre os afloramentos rochosos, algumas espécies maiores se desenvolvem, como a *Vellozia gigantea*. Fotos de A. Gomes (A, C) e G.W. Fernandes (B, D).

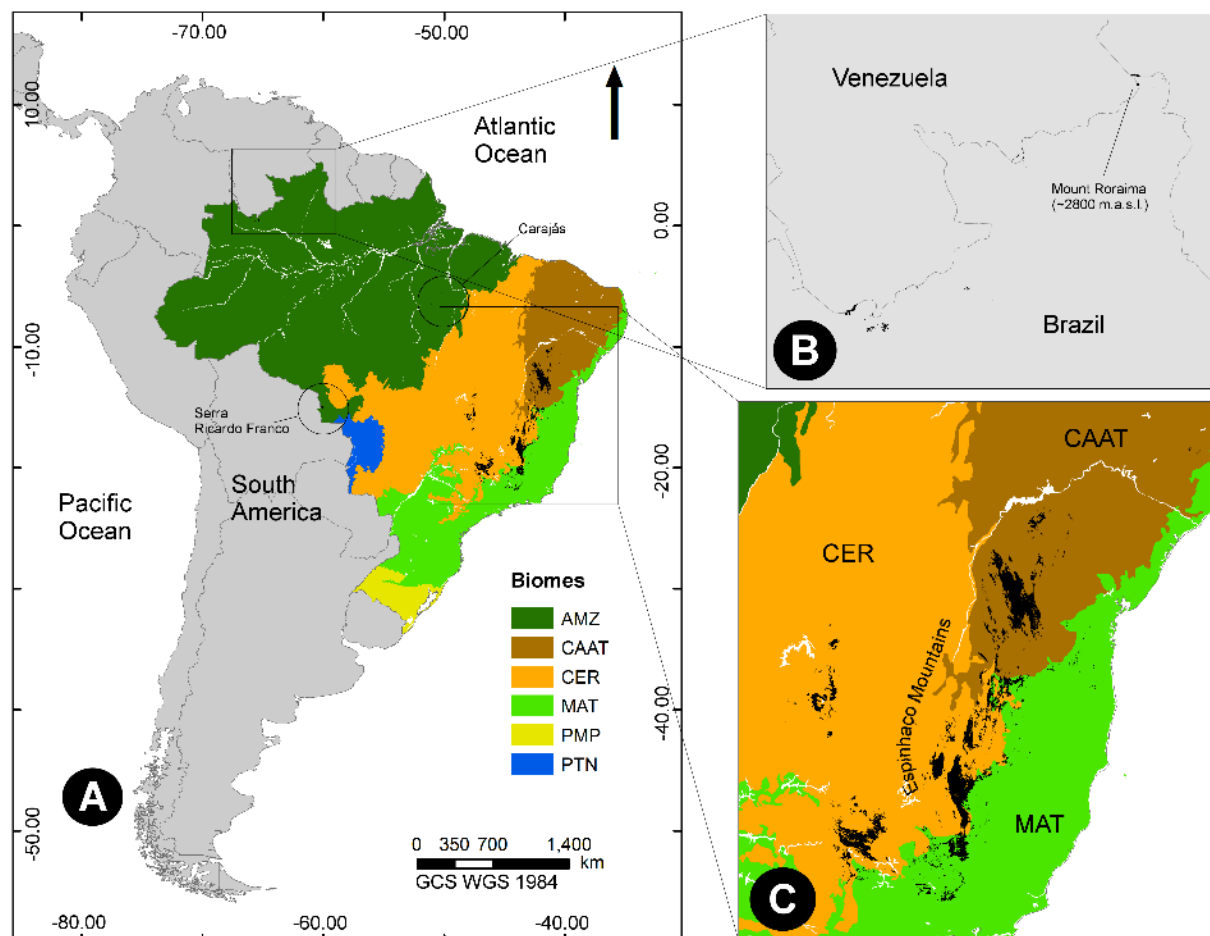

Figura 2. Distribuição espacial disjunta do Campo Rupestre (áreas pretas nos mapas) nos biomas brasileiros. **A** América do Sul com foco no território brasileiro. Dois pequenos trechos do Campo Rupestre são representados em círculos do painel A (Carajás e Serra Ricardo Franco), ambos contidos na AMZ. **B** Um painel detalhado das ocorrências do Campo Rupestre na região Norte do Brasil, e **C** nas regiões Nordeste e Sudeste do Brasil. Classificação dos biomas segundo o IBGE (2019): AMZ: Amazônia, CAAT: Caatinga, CER: Cerrado, MAT: Mata Atlântica, PMP: Pampa, PTN: Pantanal.

As espécies encontradas no Campo Rupestre evoluíram em solos extremamente pobres em nutrientes (e.g., Fernandes, 2016b; Oliveira et al., 2016; Abrahão et al., 2019) derivados de quartzitos, arenitos e rochas ricas em ferro, cujo intemperismo deu origem a substratos arenosos e nódulos de óxido de ferro (sendo esta última chamada de Canga; Ferrari et al., 2016). As

adaptações das espécies também se deram em resposta ao clima marcadamente sazonal que resulta em secas e incêndios periódicos (e.g., Silveira et al., 2016). Esses fortes filtros ambientais têm favorecido a evolução de uma vegetação com assinatura funcional caracterizada pelo crescimento lento, estratégias especializadas para aquisição e conservação de recursos, baixa produtividade e dispersão limitada (Negreiros et al., 2014; Oliveira et al., 2016; Dayrell et al., 2018; Le Stradic et al., 2018, ver também Messias et al., 2012). A combinação dessas características funcionais do Campo Rupestre resulta em uma baixa resiliência a distúrbios exógenos como a remoção de solo (e.g., Buisson et al., 2019; Fig. 3). Apesar dos avanços recentes na ecologia vegetal do Campo Rupestre, a ecologia, evolução e biogeografia da vida animal neste ecossistema ainda são pouco compreendidas (Fernandes et al., 2014, 2018a; Chaves et al., 2015; Ramos et al., 2019; Neves et al., (no prelo).

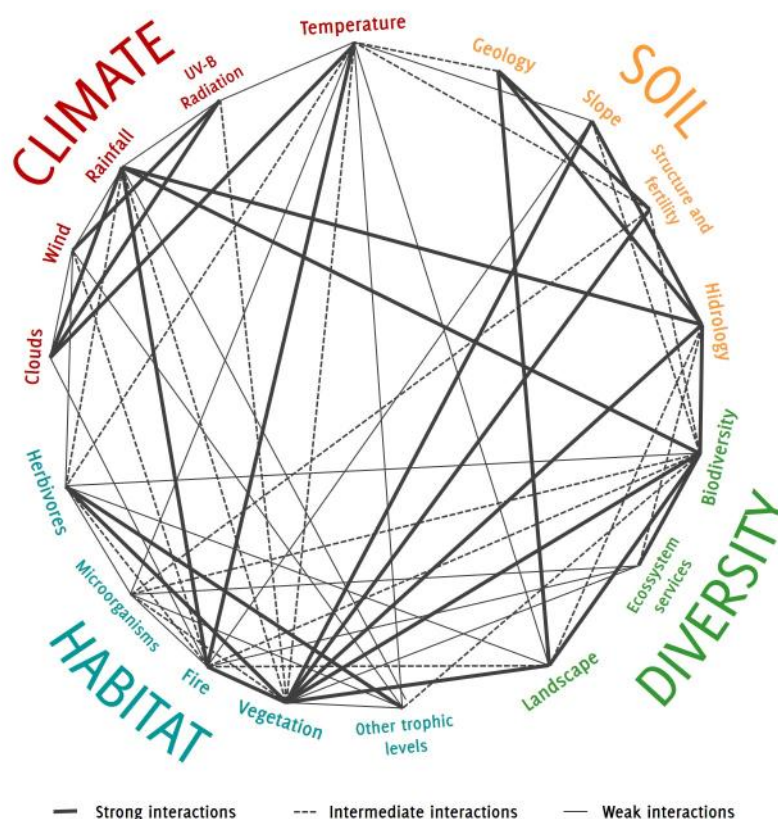

Figura 3. Fatores regionais principais e secundários que estruturam o ecossistema do Campo Rupestre a partir de suas interações. Esses fatores são categorizados por cor de acordo com seu principal modulador correspondente (Microclima, Habitat, Diversidade e Solo). As múltiplas interações são representadas pelas linhas que foram classificadas de acordo com sua significância no funcionamento do ecossistema (interações fortes —, intermediárias ---- e fracas .....). Para uma discussão mais aprofundada, incluindo a força da interação, ver Fernandes (2016b).

A abrangência dos serviços ecossistêmicos prestados pelo Campo Rupestre vai muito além de sua área de ocorrência, se estendendo para algumas das regiões mais populosas do país. Dezenas de milhões de pessoas se beneficiam do abastecimento de água, geração de energia hidrelétrica, ecoturismo, plantas medicinais, produção de forragem nativa, e estoque de carbono subterrâneo fornecido pelo Campo Rupestre. Esse ecossistema abriga pequenos riachos de

cabeceira que juntos representam cerca de 70% do comprimento total dos cursos d'água em qualquer unidade hidrológica ou bacia hidrográfica (Benda et al., 2005). Os topos das montanhas das serras da Canastra e do Espinhaço são berços de alguns dos rios mais importantes para o Brasil e fornecem água a milhões de pessoas (Fernandes et al., 2018; Callisto et al., 2019; Rodrigues et al., 2019). Além disso, o carbono estocado em órgãos de armazenamento subterrâneo de espécies de plantas do Campo Rupestre (Buisson et al., 2019) pode, globalmente, representar fontes relevantes de sequestro de carbono (ver Jung et al., 2020). Adicionalmente, a maior diversidade de micorrizas do mundo está presente no Campo Rupestre (Carvalho et al., 2012; Oki et al., 2016) o que pode ajudar a sociedade no aumento da produtividade das culturas e assegurar a segurança alimentar. Por fim, esse ecossistema também representa um importante patrimônio cênico, religioso e cultural (Giulietti et al., 1988a; Resende et al., 2013).

## **Principais Ameaças**

As atividades que representam ameaças significativas para a biodiversidade e serviços ecossistêmicos do Campo Rupestre são numerosas e incluem o mau planejamento para construção de estradas e crescimento urbano, mineração artesanal e ecoturismo descontrolado, revegetação com árvores exóticas (e.g., *Eucalyptus*), ocupação não planejada, pastoreio de gado, coleta excessiva de espécies ornamentais e falta de governança (Barbosa et al., 2010; Fernandes et al., 2014; Ribas et al., 2016; Silveira et al., 2016; Batista et al., 2018; ver revisões em Fernandes, 2016c; Fernandes et al., 2018). A história de degradação do Campo Rupestre remonta ao início do século XVII com a mineração de ouro, posteriormente, de diamantes e gemas e, nas últimas décadas, da extração de ferro e manganês. A mineração tem contribuído para o aumento da riqueza econômica em escala global. Também influenciou e moldou aspectos demográficos,

étnicos, culturais, artísticos, sociais e ambientais do Brasil (Neves et al., 2016). Entre outras atividades que afetam implacavelmente o funcionamento do Campo Rupestre estão o crescimento urbano e o ecoturismo. Em geral, essas atividades têm sido associadas a diversos conflitos ambientais e sociais (e.g., Morcatty et al., 2013; Neves et al., 2016; Fernandes et al., 2018; Pena et al., 2017; Zappi et al., 2019).

Infelizmente, as áreas protegidas existentes não são grandes ou efetivas o suficiente para proteger a biodiversidade do Campo Rupestre e preservar seus serviços ecossistêmicos (Pacheco et al., 2018). Atualmente, menos de 10% da área total do ecossistema está protegida (ca. 7720 km<sup>2</sup>), percentual que está muito abaixo da meta de 17% acordada pela Convenção sobre Diversidade Biológica (CBD; <https://www.cbd.int/sp/targets/>) (Fernandes et al., 2018). Ainda mais preocupante é o fato de que muitas dessas áreas protegidas não foram implementadas de fato, as chamadas “áreas protegidas de papel” (ver Minin & Toivonen, 2015; Metzger et al., 2019). Além disso, algumas dessas áreas protegidas enfrentam problemas significativos de disputa pela posse da terra, gerada pela interrupção dos meios de subsistência da população local e na retaliação contra as áreas protegidas por pessoas que tiveram suas terras desapropriadas. Portanto, consideramos que o conjunto atual de áreas protegidas é insuficiente para garantir a sustentabilidade do Campo Rupestre (Sonter et al., 2014; Pacheco et al., 2018). Dessa forma, a proteção da biodiversidade e dos serviços ecossistêmicos gerados pelo Campo Rupestre requerem o envolvimento imediato de vários atores sociais, incluindo comunidades locais e povos indígenas, representantes do governo, gestores de unidades de conservação, empresários, representantes da indústria e da comunidade científica.

## **Uma Aliança para a Promoção da Sustentabilidade do Campo Rupestre**

Nós propomos diretrizes para fomentar a construção de um Plano de Ação embasado em evidências científicas para a Conservação e Gestão Sustentável da Biodiversidade e dos Serviços Ecossistêmicos do Campo Rupestre (em suma, Plano de Ação para o Campo Rupestre, PACR). Estamos cientes de que, apesar de ser uma tarefa urgente, o plano precisa ser discutido em seus aspectos concretos e de governança. O PACR deve ser desenvolvido como uma plataforma com o objetivo de reunir as partes interessadas na conservação e uso sustentável do Campo Rupestre objetivando conciliar os benefícios socioeconômicos e ambientais (Fig. 4A). Essa proposta foi discutida por um grupo multidisciplinar de especialistas durante o *XI Eugene Warming Lectures in Evolutionary Ecology* (2017) promovido pela Universidade Federal de Minas Gerais (UFMG). Esse grupo é formado por cientistas que têm pesquisado intensamente os aspectos ecológicos, evolutivos e de conservação do Campo Rupestre nas últimas quatro décadas. O grupo tem lidado com conflitos de conservação, discussões de políticas públicas e questões científicas emergentes sobre a conservação e uso sustentável do Campo Rupestre. Discussões *online* seguiram ao encontro, e aqui agrupamos os produtos dessas discussões para fundamentar ainda mais o debate e as ações multidisciplinares necessárias junto à sociedade.



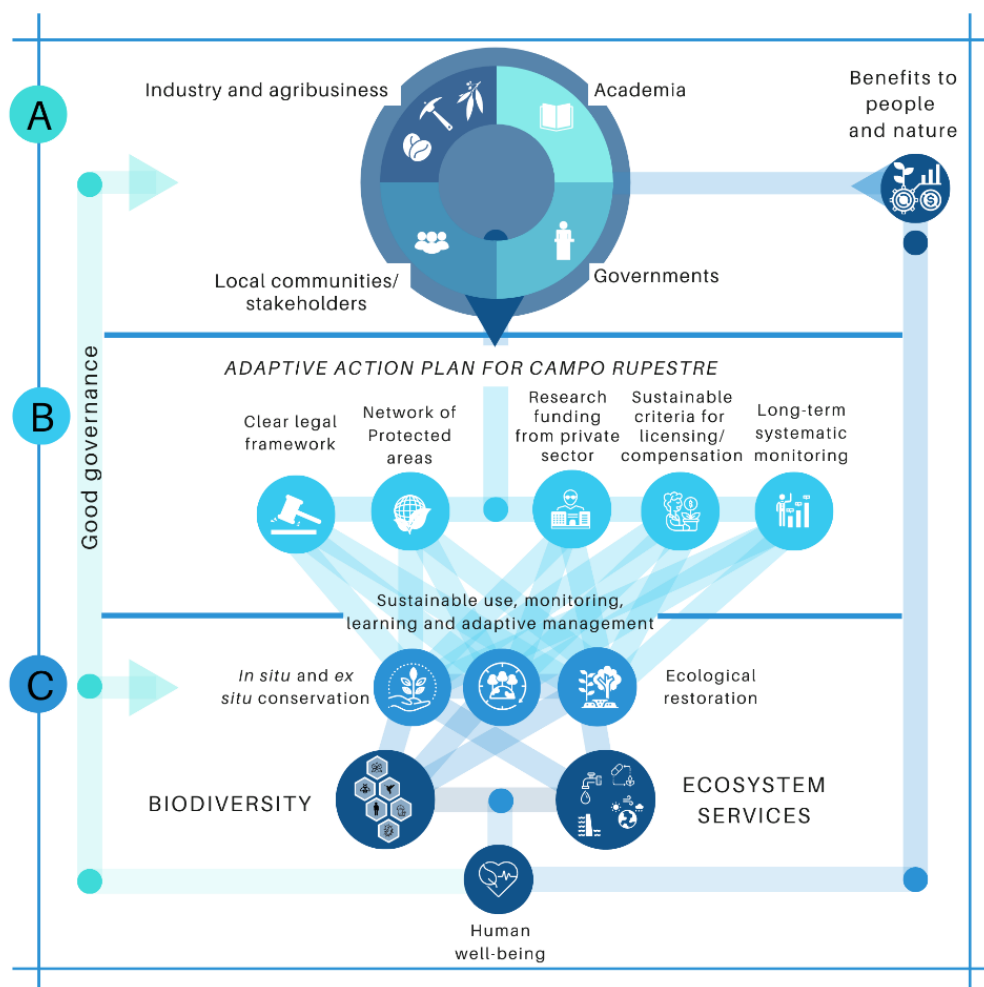

Figura 4. Modelo que mostra a base conceitual do Plano de Ação do Campo Rupestre (PACR). O modelo é dividido em 3 seções: **A** principais atores sociais envolvidos, **B** ações propostas para apoiar o PACR e **C** resultados esperados após a implementação das estratégias do PACR. O objetivo final é promover o bem-estar humano beneficiando as pessoas e a natureza. A estrutura também ilustra os ciclos de inter-relações que influenciam positivamente o uso sustentável do Campo Rupestre.

Ainda que algumas estratégias de conservação para plantas ameaçadas tenham sido propostas recentemente pelo Plano de Ação Nacional do Espinhaço do Sul (Pougy et al., 2015), falta uma abordagem ampla que proteja a biodiversidade como um todo (Monteiro et al., 2018). As propostas a seguir, estão em consonância com essa lacuna e foram definidas considerando

acordos internacionais de sustentabilidade, incluindo a CDB e a Agenda de 2030 das Nações Unidas para o *Sustainable Development Goals* (SDGs) e suas metas associadas. Embora existam muitos modelos ou iniciativas diferentes que abordam os SDGs, o *The Economics of Ecosystems and Biodiversity* (TEEB) representa uma iniciativa global focada em "tornar os valores da natureza visíveis" e, portanto, se encaixa em nossos objetivos para o Campo Rupestre. O TEEB segue uma abordagem estruturada de avaliação que ajuda os tomadores de decisão a reconhecer a ampla gama de benefícios fornecidos pelos ecossistemas e pela biodiversidade, a demonstrar os valores em termos econômicos e, quando apropriado, agregar essa valoração na tomada de decisão (Sukhdev, 2008). O principal objetivo desta iniciativa é integrar o valor econômico contido na biodiversidade e nos serviços ecossistêmicos à tomada de decisões em todos os níveis.

No PACR, oferecemos uma lista de atividades para desenvolver políticas públicas considerando a academia, as comunidades locais, a indústria e o governo (ver alguns exemplos na Fig. 4B). Todos os atores sociais (incluindo o setor privado) compartilham responsabilidades e são representados por grupos de trabalho que tomam decisões e recomendações coletivas. A perspectiva integrativa do PACR é baseada em três estratégias, 1) a conservação *in situ* e *ex situ*, 2) o uso, monitoramento e manejo sustentável, e 3) a restauração ecológica.

Um dos princípios centrais do PACR é o desenvolvimento de indicadores quantitativos precisos e definições inequívocas para o monitoramento de longo prazo de forma a direcionar estratégias de conservação e avaliar o sucesso de restauração. O monitoramento sistemático durante todas as fases é fundamental para o desenvolvimento de políticas eficazes e a implementação dessas ações e medidas (ver Fernandes et al., 2016, Kollmann et al., 2016). Cada estratégia de conservação tem seu próprio valor e propósito, mas a conservação *in situ* é a

escolha preferencial. A conservação *ex situ* também é relevante e deve ser usada sempre que possível para auxiliar no cumprimento dos objetivos de conservação. A restauração ecológica do Campo Rupestre é fundamental para garantir os serviços ecossistêmicos e a biodiversidade. Embora estudos recentes tenham mostrado avanços para o Campo Rupestre (revisado em Fernandes et al., 2016, ver também Gomes et al., 2015), ainda existem inúmeros desafios a serem superados nessa área para os campos tropicais em geral, como mostrado por Buisson et al., (2019).

Apesar de o PACR aqui proposto ainda precisar ser convertido em ações concretas, dada a governança e contingências operacionais, defendemos que é imprescindível que todas as etapas e decisões do PACR sejam orientadas por evidências científicas. Uma mudança em direção à aplicação efetiva da ciência é necessária para apoiar um fluxo adaptativo de processos. Espera-se que a implementação bem-sucedida do PACR proteja a biodiversidade e os serviços ecossistêmicos para proporcionar benefícios positivos e duradouros para a nossa sociedade (ver Fig. 4C para alguns exemplos dos resultados esperados).

## **Políticas Públicas**

As taxas de mudanças no uso da terra no Campo Rupestre ainda são em grande parte desconhecidas, principalmente devido aos baixos requerimentos legais para seu monitoramento. No entanto, foram documentados impactos drásticos desde a descoberta de ouro e diamantes no início do século XVII e o aumento da mineração de minério de ferro a partir da Segunda Guerra Mundial (Neves et al., 2016). Alguns exemplos do mau uso da terra que colocam em risco a conservação a longo prazo do Campo Rupestre incluem a ocupação ilegal de áreas rurais para lazer e agropecuária, expansões não regulamentadas de mineração de quartzito no planalto de

Diamantina, cultivo de eucalipto, café e manga em solos rasos e turfeiras, além da ocupação irregular de áreas ao redor de nascentes. Nesse sentido, as políticas públicas relativas à conservação do Campo Rupestre devem contemplar os seguintes critérios:

i. Uma abordagem nos moldes TEEB de valoração econômica da biodiversidade e dos serviços ecossistêmicos do Campo Rupestre para embasar as reivindicações dos atores sociais no processo de tomada de decisão em relação à ampla gama de benefícios fornecidos pelos ecossistemas e pela biodiversidade;

ii. Enrijecer e fazer cumprir a regulamentação atual juntamente com o desenvolvimento de uma legislação nova e específica que leve em consideração as características das vegetações não florestais e que inclua as espécies mais ameaçadas do Campo Rupestre. Isso pode ser alcançado por meio de cada Conselho Estadual Regional de Política Ambiental, que são grupos colegiados de natureza consultiva, normativa e deliberativa formados por especialistas. Assim, no âmbito de sua respectiva competência, podem formular propostas normativas sobre a gestão sustentável e os indicadores quantitativos para estratégias de monitoramento, conservação e restauração de longo prazo (e.g., art. 214, §7º e art. 57 da Lei Estadual de MG 20.922 / 2013). Tais conselhos devem discutir a legislação específica com o apoio técnico-acadêmico na revisão dos critérios de licenciamento e compensação financeira (Miola et al., 2019, ver também Fernandes et al., 2020);

iii. Apesar do papel-chave amplamente reconhecido da ciência em dar suporte para tomadas de decisão respaldadas em evidências, os recursos disponíveis para financiamento de pesquisa no Brasil ainda são escassos (Fernandes et al., 2017). Defendemos a idéia de que uma alternativa para fornecer financiamento adicional aos projetos de pesquisa de conservação seja oriundo de investimentos privados. Propomos o desenvolvimento de instrumentos jurídicos que possibilitem

apoiar estudos científicos de longo prazo, destinando parte dos recursos financeiros obtidos com indenizações, *royalties* do setor de mineração e taxas de conservação cobradas sobre a exploração turística sustentável de áreas protegidas para esses estudos (e.g., Silveira et al., 2019). Uma fonte de financiamento alternativa potencial é a Compensação Financeira pela Exploração de Recursos Minerais (CFEM), que compreende recursos pagos pelas mineradoras ao Governo Federal e que são parcialmente devolvidos aos municípios que abrigam as atividades de mineração (Leis federais brasileiras 7.990/1990 e 8001/1990 e Decreto 01/1991). Infelizmente, a atual abordagem excessivamente centralizada do Governo Federal determina que ca. 35% dos recursos do CFEM permaneçam na esfera federal e estadual;

iv. A criação de instrumentos legais para o pagamento por serviços ecossistêmicos (PSE) que priorizem a segurança hídrica e alimentar, a conservação da biodiversidade e os estoques de carbono. O PSE pode seguir exemplos como os produtores de água no município de Extrema, Minas Gerais, Brasil (Programa Produtores de Água) ou programas PSE relacionados ao desastre da barragem em Mariana, Minas Gerais, Brasil;

v. O estabelecimento de políticas e desenvolvimento de protocolos para monitorar e minimizar o impacto de ameaças relacionadas à infraestrutura da construção de rodovias, incluindo invasões biológicas e erosão do solo (Barbosa et al., 2010);

vi. O estabelecimento de um banco de dados público dos inventários da biodiversidade do Campo Rupestre para apoiar estudos de avaliação ambiental. Essa plataforma também deve integrar e fortalecer acervos científicos de diferentes instituições e disponibilizar *on-line* informações georreferenciadas de todos os registros;

vii. Atividade de mineração mais sustentável para mitigar os conflitos entre mineração, aspectos ambientais e socioeconômicos (Neves et al., 2016; Collins e Kumral, 2019). Para isso, deve-se fomentar um conjunto de ações. Por exemplo, a revisão da legislação vigente para melhor compensar os municípios onde ocorrem a extração do minério para que medidas legais sejam estabelecidas e orientem a alocação desses recursos. Esses recursos financeiros poderiam ser usados pelos governos locais para estimular o desenvolvimento sustentável em seus municípios, incluindo ações para conservar ou aumentar os serviços ambientais essenciais para a região, para mitigar os impactos sociais das atividades de mineração, bem como estabelecer relações positivas entre a mineração e outros setores como assistência social e educacional (Barbieri et al., 2014; Neves et al., 2016). Considerando que os impostos de mineração não são suficientes para compensar a perda de serviços ecossistêmicos (Domingues et al., 2012), os prejuízos sociais e ambientais da mineração deveriam ser incluídos pelos municípios na contabilidade e valoração dos danos causados com atividades de mineração (e.g., usando o Indicador de Progresso Genuíno: Berik 2020). Incorporar a dimensão socioeconômica no processo de tomada de decisão é um passo fundamental para uma mineração mais sustentável. Além disso, todos os setores da sociedade devem ser incentivados a estabelecer novas áreas protegidas com o objetivo de melhorar a conservação *in situ* do Campo Rupestre e complementar o conjunto de unidades de conservação administrada pelo governo.

### **Conservação, gestão e restauração da biodiversidade e dos serviços ecossistêmicos**

A distribuição geográfica restrita de pequenas populações e sua especificidade de habitat, juntamente com o aumento dos impactos de origem antropogênicas, resultam em um grande

número de espécies ameaçadas no Campo Rupestre (Pougy et al., 2015). As atividades para a conservação de longo prazo da biodiversidade do Campo Rupestre e seus serviços ecossistêmicos, devem incluir:

- i. Desenvolvimento e manutenção de programas de monitoramento de longo prazo para garantir a conservação de espécies ameaçadas de extinção envolvendo estratégias de conservação *in situ* e *ex situ*;
- ii. Estímulo e fomento de programas de pesquisa para o registro e proteção do patrimônio cultural. Especialmente aqueles vinculados aos conhecimentos tradicionais de gestão e uso de ecossistemas, feitos por comunidades que favorecem a conservação da biodiversidade (Gavin et al., 2015);
- iii. Mapeamento e estabelecimento de indicadores de biodiversidade para embasar o monitoramento dos efeitos das mudanças globais que afetam a biodiversidade e os serviços ecossistêmicos (Fernandes et al., 2018; Callisto et al., 2019; Chase et al., 2020);
- iv. Identificação de bioindicadores para embasar o monitoramento da integridade da paisagem;
- v. A avaliação da integridade ecológica das atuais áreas protegidas do Campo Rupestre, em termos de eficácia da atual e futura proteção da biodiversidade e dos serviços ecossistêmicos;
- vi. O estabelecimento de áreas prioritárias para a expansão das atuais áreas protegidas em busca de um planejamento mais eficaz à nível de paisagem. Essas áreas devem ser estabelecidas com base em pareceres de comitês técnicos, nos diversos aspectos da conservação e nas demandas das comunidades tradicionais, indígenas e representantes da indústria;

vii. O desenvolvimento e implementação de protocolos de manejo integrado do fogo para manter a biodiversidade em mosaicos heterogêneos de paisagem, onde comunidades de plantas propensas ao fogo co-existam com comunidades sensíveis ao fogo (Batista et al., 2018; Figueira et al., 2016; Rodrigues et al., 2019).

viii. O desenvolvimento de estratégias que integrem as comunidades locais em programas de educação ambiental de longo prazo, incluindo programas de ciência cidadã com o envolvimento de escolas, produtores rurais, empresas de turismo e comunidades religiosas, estimulando a participação e o emprego das populações locais como agentes de educação (França et al., 2019).

### **Desenvolvimento socioeconômico regional e planejamento territorial**

Devido às condições ambientais adversas e solos nutricionalmente pobres, muitas das áreas onde o Campo Rupestre ocorre têm baixo potencial para agricultura em grande escala (Almada et al., 2016). Como consequência, as populações humanas tiram seu sustento principalmente da agricultura familiar e pecuária, caça, extração de minerais e coleta de plantas ornamentais, incluindo espécies ameaçadas de extinção (Giulietti et al., 1988b; Almada et al., 2016). Entretanto, pastagens de gado abertas por incêndios antropogênicos (Batista et al., 2018), plantações de *Eucalyptus* (Ribas et al., 2016) e agricultura estão sendo expandidos para áreas do Campo Rupestre. As atividades de silvicultura e a agricultura são dependentes do uso de fertilizantes, calagem e pesticidas que alteram o teor nutricional dos solos do Campo Rupestre pobres em nutrientes, facilitando invasões biológicas e mudando os regimes naturais de fogo (Barbosa et al., 2010).



Se for bem planejado e com bases científicas sólidas, o uso direcionado dos recursos biológicos do Campo Rupestre pode ajudar à conciliar conservação e os objetivos econômicos de longo prazo. Nesse sentido, a implementação de um sistema econômico fundamentado no uso racional de recursos renováveis como a bioeconomia pode representar uma estratégia potencial para alcançar a sustentabilidade neste ecossistema (Aguilar et al., 2019; Ladu et al., 2020 ) Do ponto de vista do desenvolvimento socioeconômico do Campo Rupestre e da manutenção de seu capital natural, é necessário:

- i. Desenvolver modelos de bioeconomia condizentes com a conservação e uso sustentável dos recursos do ecossistema de acordo com os meios de subsistência das comunidades locais (Aguilar et al., 2019);
- ii. Promover a unificação dos planos diretores urbanos e regionais de todos os municípios que abrigam a vegetação do Campo Rupestre para melhorar o planejamento do desenvolvimento urbano e aumentar a conectividade da paisagem;
- iii. Avaliar a situação atual do Cadastro Ambiental Rural e tomar medidas legais para desenvolver estratégias de padronização e implantação de Áreas de Preservação Permanente e Reserva Legal em áreas privadas nos municípios abrangidos pelo Campo Rupestre.
- iv. Modelagem de múltiplos cenários de compensação ambiental com o objetivo de alcançar uma perda mínima de biodiversidade pelas atividades econômicas e orientar os tomadores de decisão (Sonter et al., 2014).

v. Identificar características sociais, culturais e econômicas das comunidades tradicionais, incluindo os quilombolas, e trabalhar em conjunto com seus conhecimentos etnoecológicos para reduzir a exploração excessiva.

### **Em direção ao ecoturismo sustentável**

Embora as montanhas sejam destinos desejados para o turismo e demandados por visitantes que buscam beleza cênica e aventura, a expansão turística não planejada tem sido uma fonte de alto impacto ambiental para o Campo Rupestre (Fernandes, 2016c). Ainda que a recreação seja um atrativo essencial para os turistas que visitam o Campo Rupestre (Resende et al., 2017), a superexploração das áreas visitadas pode levar à degradação da paisagem incluindo trilhas, cachoeiras, rio intermitentes e perenes, rios e beiras de estradas. Por isso, uma agenda positiva para o desenvolvimento do ecoturismo sustentável requer:

- i. Desenvolvimento de indicadores quantitativos para monitorar e regular os impactos do turismo;
- ii. Determinação da capacidade de suporte, em termos de número de visitantes, nos locais turísticos em áreas protegidas;
- iii. Desenvolvimento de iniciativas locais de educação ambiental, incluindo monitoramento participativo (ciência cidadã) com alunos e professores das escolas locais;
- iv. Desenvolvimento de treinamento científico para guias turísticos e moradores locais, de forma a compartilhar benefícios e conhecimentos;

v. Promoção de atividades de divulgação científica para turistas e comunidades locais (e.g., observação de pássaros e turismo de vida selvagem que combinam geração de renda e conservação).

### **Em direção às comunidades científicas e locais engajadas**

Aumentar o envolvimento da comunidade científica no processo de tomada de decisão é vital para garantir soluções sustentáveis, duradouras e embasadas em evidências. Além disso, aumentar o envolvimento das comunidades locais também é importante para garantir que suas necessidades sejam simultaneamente atendidas de forma adequada e para incorporar seus conhecimentos tradicionais e valiosos no processo de tomada de decisão. É provável que o desequilíbrio da representatividade política e administrativa não consiga conciliar os interesses dos vários atores sociais interessados. Para melhorar os resultados, precisamos:

- i. Ampliar a representação acadêmica em comitês de bacias hidrográficas, conselhos consultivos de unidades de conservação e conselhos em agências ambientais e regulatórias;
- ii. Incentivar a articulação da academia com órgãos ambientais, tomadores de decisão e legisladores por meio de cursos, treinamentos técnicos, eventos unificados e acordos de cooperação técnico-científica.
- iii. Criar mecanismos para garantir a representação e empoderamento das comunidades locais e tradicionais.

## **Questões científicas e conhecimento técnico emergentes**

Embora o número de estudos sobre o Campo Rupestre tenha aumentado significativamente nas últimas três décadas (revisões em Fernandes et al., 2018a; Morellato & Silveira, 2018), ainda persistem grandes lacunas de conhecimento em relação a esse ambiente. Podem ser identificadas uma série de questões prioritárias que são fundamentais para a tomada de decisões informadas e que irão beneficiar tanto a natureza quanto as pessoas associadas ao Campo Rupestre. Ações relevantes para preencher lacunas de conhecimento incluem a formulação de chamadas para financiamento de pesquisas científicas multi e interdisciplinares de longo prazo por agências de financiamento privadas e governamentais. Algumas questões urgentes incluem: 1) uma amostragem robusta da quantificação dos serviços ecossistêmicos gerados pelo Campo Rupestre, 2) monitoramento das mudanças climáticas mostrando os impactos, vulnerabilidades e adaptações necessárias, 3) monitoramento e manejo do fogo, 4) avaliações da conversão do uso da terra, 5) determinação da resiliência do ecossistema, 6) o desenvolvimento do conhecimento científico em restauração ecológica, 7) inventário da biodiversidade em áreas pouco amostradas, 8) implementação de protocolos de conservação *ex situ* para táxons ameaçados, 9) integração do conhecimento ecológico tradicional e científico para o manejo comunitário, 10) promoção da justiça ambiental e participação pública com o uso de modelos de bioeconomia.

## **Síntese e o caminho a seguir**

Sob a sombra da crescente ameaça antropogênica e da erosão do patrimônio natural e cultural do Campo Rupestre, o PACR pode fornecer o gatilho inicial para desencadear um

programa inovador e de larga escala em bioeconomia no Brasil. As medidas e ações sinérgicas do PACR podem contribuir para mudar o atual paradigma de conservação brasileiro e proteger um de seus ecossistemas mais ameaçados. Essas ações têm o potencial de aumentar os benefícios socioeconômicos por meio da geração de renda e da criação de empregos em atividades ecologicamente sustentáveis e economicamente viáveis. O PACR propõe um conjunto de medidas concretas que, se implementadas e integradas, podem levar a uma mudança positiva nos modelos de uso do solo e da água, permitindo assim o uso/desenvolvimento sustentável do Campo Rupestre e sua população associada.

O PACR sugere mecanismos específicos para avançar e uniformizar o engajamento entre os atores envolvidos em promulgar uma legislação específica que conduza para a conservação e uso sustentável do Campo Rupestre. Embora reconheçamos que as ações propostas não cubram todas as necessidades relevantes, acreditamos que o PACR pode ser uma plataforma científica eficaz para desenvolver e implementar as mudanças adaptativas necessárias. Postulamos que esta aliança integrativa seja fundamental para a conservação e uso sustentável do Campo Rupestre que vai gerar benefícios à natureza e às pessoas.

### **Agradecimentos**

Os autores agradecem a dois revisores anônimos, ao Renato R. Silva e G. Overbeck pelos comentários nas versões anteriores do manuscrito. Este trabalho teve o apoio do Conselho Nacional de Pesquisas (CNPq / MCTIC) e da Fundação de Amparo à Pesquisa do Estado de Minas Gerais (FAPEMIG) para o financiamento da Pesquisa Ecológica de Longo Prazo (PELD-CRSC-17) e da Coordenadoria de Aperfeiçoamento de Pessoal de Nível Superior (CAPES-PRINT). Agradecemos também o apoio das empresas Cedro Têxtil, Reserva Vellozia, ICMBio, e

*G.W. Fernandes et al. 2020 / Perspectives in Ecology and Conservation*

Parque Nacional da Serra do Cipó, GSG, Pousada Elefante, Pousada Serra Morena, Anglo American e CRBio. O LPCM agradece à Fundação de Amparo à Pesquisa do Estado de São Paulo (FAPESP) pelas bolsas # 2013 / 50155-0 # 2010 / 51307-0. RSO foi apoiado pela FAPESP-NERC (2019 / 07773-1). GWF, RSO, LPCM, MC, FSN, RS e FAOS receberam uma bolsa de produtividade em pesquisa do CNPq, o NCS recebeu um Ph.D. bolsista da CAPES. RD foi apoiado pela Escola de Humanidades e Ciências de Stanford por meio do Departamento de Biologia e do Centro de Estudos Latino-Americanos.

## Referências

- Abrahão, A., de Brito Costa P., Lambers, H., Andrade S.A.L., Sawaya A.C.H.F., Ryan, M.H., Oliveira, R.S., 2019. Soil types select for plants with matching nutrient- acquisition and use traits in hyperdiverse and severely nutrient-impovertised campos rupestres and cerrado in Brazil Central. *J. Ecol.* 107, 1302-1316. <http://doi.org/10.1111/1365-2745.13111>
- Aguilar, A., Twardowski, T., Wohlgemuth, R., 2019. Bioeconomy for sustainable development. *Biotechnol. J.* 14, 1-11. <https://doi.org/10.1002/biot.201800638>
- Almada, E.D., Anaya, F.C., Monteiro, F.T., 2016. The people of the mountains: The biocultural heritage of the Espinhaço Range in Minas Gerais State, Brazil, in: Fernandes, G.W. (Ed.), *Ecology and Conservation of Mountaintop Grasslands in Brazil*. Springer, Switzerland, pp. 479-499. [http://doi.org/10.1007/978-3-319-29808-5\\_20](http://doi.org/10.1007/978-3-319-29808-5_20)
- Alves R.J.V., Kolbek J., 1994. Plant species endemism in savanna vegetation on table mountains (campo rupestre) in Brazil. *Vegetatio. (Plant Ecol.)* 113, 125–139. <https://doi.org/10.1007/BF00044230>
- Barbieri, A.F., Domingues, E.P., Monte-Mór, R.L.M., Santos, F.B.T., Rigotti, J.I.R., Rodrigues, B.H.M., Tonucci, J., Neto, O.B., Cortezzi, F., 2014. Plano regional estratégico em torno de grandes projetos minerários no médio Espinhaço. FUNDED, Belo Horizonte, Brazil.
- Barbosa, N.P.U., Fernandes, G.W., Carneiro, M.A.A., Junior, L.A.C., 2010. Distribution of non-native invasive species and soil properties in proximity to paved roads and unpaved roads in a quartzitic mountainous grassland of southeastern Brazil (rupestrian fields). *Biol. Invasions* 12, 3745–3755. <http://doi.10.1007/s10530-010-9767-y>

*G.W. Fernandes et al. 2020 / Perspectives in Ecology and Conservation*

- Barbosa, N.P.U., Fernandes, G.W., 2016. Rupestrian grassland: past, present and future distribution, in: Fernandes, G.W. (Ed.), Ecology and Conservation of Mountaintop Grasslands in Brazil. Springer, Switzerland, pp. 531-544. [http://dx.doi.org/10.1007/978-3-319-29808-5\\_22](http://dx.doi.org/10.1007/978-3-319-29808-5_22)
- Batista, E.K.L., Russell-Smith, J., França, H., Figueira, J.E.C., 2018. An evaluation of contemporary savanna fire regimes in the Canastra National Park, Brazil: Outcomes of fire suppression policies. *J. Environ. Manage.* 205, 40-49. <https://doi.org/10.1016/j.jenvman.2017.09.053>
- Benda, L., Hassan, M.A., Church, M., May, C.L. (2005). Geomorphology of steep-land headwaters: the transition from hillslopes to channels. *J. Am. Water Resour. Assoc.* 41, 835–851. <https://doi.org/10.1111/j.1752-1688.2005.tb03773.x>
- Berik, G., 2020. Measuring what matters and guiding policy: An evaluation of the Genuine Progress Indicator. *Int. Lab. Rev.* 159, 71-94. <https://doi.org/10.1111/ilr.12153>
- Bond, W.J., 2019. Open Ecosystems: Ecology and Evolution Beyond the Forest Edge. Oxford University Press, UK. 175p.
- Buisson, E., Le Stradic, S., Silveira, F.A.O., Durigan, G., Overbeck, G.E., Fidelis, A., Fernandes, G.W., Bond, W.J., Hermann, J-M., Mahy, G., Alvarado, S.T., Zaloumis, N.P., Veldman, J.W., 2019. Resilience and restoration of tropical and subtropical grasslands, savannas, and grassy woodlands. *Biol. Rev.* 94, 590-609. <https://doi.org/10.1111/brv.12470>
- Callisto, M., Solar, R., Silveira, F.A.O, Saito, V.S., Hughes, R.M., Fernandes, G.W., Gonçalves-Júnior, J.F., Leitão, R.P., Massara, R.L., Macedo, D.R., Neves, F.S., Alves, C.B.M., 2019.



*G.W. Fernandes et al. 2020 / Perspectives in Ecology and Conservation*

A Humboldtian approach to mountain conservation and freshwater ecosystem services.

Front. Environ. Sci. 7, 1-12. <https://doi.org/10.3389/fenvs.2019.00195>

Carvalho, F., De Souza, F.A., Carrenho, R., de Souza Moreira, F.M., da Conceição Jesus, E.,

Fernandes, G.W., 2012. The mosaic of habitats in the high-altitude Brazilian rupestrian fields is a hotspot for arbuscular mycorrhizal fungi. Appl. Soil Ecol. 52, 9-19.

<https://doi.org/10.1016/j.apsoil.2011.10.001>

Chaves, A.V., Freitas, G.H., Vasconcelos, M.F., Santos, F.R., 2015. Biogeographic patterns,

origin and speciation of the endemic birds from eastern Brazilian mountaintops: a review.

Syst. Biodivers. 13, 1-16. <https://doi.org/10.1080/14772000.2014.972477>

Chase, J.M., Jeliaskov, A., Ladouceur, E., Viana, D.S., in press. Biodiversity conservation

through the lens of metacommunity ecology. Ann. NY Acad. Sci.

Coelho, M.S., Neves, F.S., Perillo, L.N., Morellato, L.P.C. & Fernandes, G.W. (2018) Forest

archipelagos: a natural model of metacommunity under the threat of fire. Flora, 238, 244–249.

Collins, B., Kumral, M., 2019. Environmental sustainability, decision-making, and management

for mineral development in the Canadian Arctic. Int. J. Sust. Dev. World pp. 1-13.

<https://doi.org/10.1080/13504509.2019.1684397>

Colli-Silva, M., Vasconcelos, T.N., Pirani, J.R., 2019. Outstanding plant endemism levels

strongly support the recognition of campo rupestre provinces in mountaintops of eastern

South America. J. Biogeogr. 46, 1723-1733. <https://doi.org/10.1111/jbi.13585>

*G.W. Fernandes et al. 2020 / Perspectives in Ecology and Conservation*

Dayrell, R.L., Arruda, A.J., Pierce, S., Negreiros, D., Meyer, P.B., Lambers, H., Silveira, F.A.O.,  
2018. Ontogenetic shifts in plant ecological strategies. *Funct. Ecol.* 32, 2730-2741.

<https://doi.org/10.1111/1365-2435.13221>

De Bano, L.F., Ffolliott, P.F., Ortega - Rubio, A., Gottfried, G.J., Hamre, R.H., Edminster, C.B.,  
1995. (Eds). Biodiversity and management of the Madrean Archipelago: the sky islands of  
southwestern United States and northwestern Mexico. General Technical Report, RM -  
GTR - 264. Fort Collins, CO, U. S. Department of Agriculture, Forest Service , Rocky  
Mountain Forest and Range Experiment Station. 669 p.

Díaz, S., Settele, J., Brondízio, E.S., Ngo, H.T., Agard, J., Arneth, A., Balvanera, P., Brauman,  
K.A., Butchart, S.H.M., Chan, K.M.A., Garibaldi, L.A., Ichii, K., Liu, J., Subrmanian,  
S.M., Midgley, G.F., Miloslavich, P., Molnár, Z., Obura, D., Pfaff, A., Polasky, S., Purvis,  
A., Razzaque, J., Reyers, B., Chowdhury, R.R., Shin, Y-J., Visseren-Hamakers, I., Wilis,  
K.J., Zayas, C.N., 2019. Pervasive human-driven decline of life on Earth points to the need  
for transformative change. *Science* 366, 1-10. <https://doi.org/10.1126/science.aax3100>

Di Minin, E., Toivonen, T., 2015. Global protected area expansion: creating more than paper  
parks. *BioScience* 65, 637-8. <https://doi.org/10.1093/biosci/biv064>

Domingues, S.A., Karez, C.S., Biondini, I.V.F., Andrade, M.A., Fernandes, G.W., 2012.  
Economic environmental management tools in the Serra do Espinhaço Biosphere Reserve.  
*J. Sustain. Dev.* 5, 180–191.

*G.W. Fernandes et al. 2020 / Perspectives in Ecology and Conservation*

- Echternacht, L., Trovó, M., Oliveira, C.T.C.T., Pirani, J.R., 2011. Areas of endemism in the Espinhaço Range in Minas Gerais, Brazil. *Flora* 206, 782–791.  
<https://doi.org/10.1016/j.flora.2011.04.003>
- Fernandes, G.W. ed., 2016a. *Ecology and Conservation of Mountaintop Grasslands in Brazil*. Springer, Switzerland. <http://doi.org/10.1007/978-3-319-29808-5>
- Fernandes, G.W., 2016b. The megadiverse rupestrian grassland, in: Fernandes, G.W. (Ed.), *Ecology and Conservation of Mountaintop Grasslands in Brazil*. Springer, Switzerland, pp. 3-14. [http://doi.org/10.1007/978-3-319-29808-5\\_1](http://doi.org/10.1007/978-3-319-29808-5_1)
- Fernandes, G.W., 2016c. The shady future of the rupestrian grassland: major threats to conservation and challenges in the Anthropocene, in: Fernandes, G.W. (Ed.), *Ecology and Conservation of Mountaintop Grasslands in Brazil*. Springer, Switzerland, pp. 545-561. [http://doi.org/10.1007/978-3-319-29808-5\\_23](http://doi.org/10.1007/978-3-319-29808-5_23)
- Fernandes, G.W., Barbosa, N.P.U., Negreiros, D., Paglia, A.P., 2014. Challenges for the conservation of vanishing megadiverse rupestrian grasslands. *Perspect. Ecol. Conserv.* 2, 162-165. <http://doi.org/10.1016/j.ncon.2014.08.003>
- Fernandes, G.W., Barbosa, N.P.U., Alberton, B., Barbieri, A., Dirzo, R., Goulart F., Guerra, T.J., Morellato, L.P.C., Solar, R., 2018. The deadly route to collapse and the uncertain fate of the rupestrian grasslands. *Biodivers. Conserv.* 27, 2587-2603.  
<https://doi.org/10.1007/s10531-018-1556-4>

*G.W. Fernandes et al. 2020 / Perspectives in Ecology and Conservation*

- Fernandes, G.W., Toma, T.S.P., Angrisano, P., Overbeck, G., 2016. Challenges in the restoration of quartzitic and ironstone rupestrian grasslands. In: Fernandes, G.W. (Ed.), *Ecology and Conservation of Mountaintop Grasslands in Brazil*. Springer, Switzerland, pp 449-477.
- Fernandes, G.W., Bahia, T.O., Almeida, H.A. Conceição, A.A., Loureiro, C.G. Luz, G.R., Neves, A.C.O., Oki, Y., Pereira, G.C.N., Pirani, J.R., Viana, P.L., Negreiros, D. 2020. Floristic and functional identity of rupestrian grasslands as a subsidy for environmental restoration and policy. *Ecol. Com.* 43: 1-8. <https://doi.org/10.1016/j.ecocom.2020.100833>
- Fernandes, G.W., Vale, M.M., Overbeck, G.E., Bustamante, M.M.C., Grelle, C.E.V., Bergalo, H.G., Magnusson, W.E., Akama, A., Alves, S.A., Amorim, A., Araújo, J., Barros, C.F., Bravo, F., Carim, M.J.V., Cerqueira, R., Collevatti, R.G., Colli, G.R., Cunha, C.N., D'Andrea, P.S., Dianese, J.C., Diniz, S., Estrela, P.C., Fernandes, M.R.M., Fontana, C.S., Giacomini, L.L., Gusmão, L.F.P., Juncá, F.A., Lins, A.C.B., Lopes, C.R.A.S., Lorini, M.L., Queiroz, L.P., Malabarba, L.R., Marimon, B.S., Marimon-Junior, B., Marques, M.C.M., Martinelli, B.M., Martins, M.B., Medeiros, H.F., Menin, M., Morais, P.B., Muniz, F.H., Neckel-Oliveira, S., Oliveira, J.A., Oliveira, R.P., Pedroni, F., Penha, J., Podgaiski, L.R., Rodrigues, D.J., Scariot, A., Silveira, L.F., Silveira, M., Tomas, W.M., Vital, M.J.S., Pillar, V.D., 2017. Dismantling Brazil's science threatens global biodiversity heritage. *Perspect. Ecol. Conserv.* 15, 239–243. <https://doi.org/10.1016/j.pecon.2017.07.004>
- Ferrari, L.T., Schaefer, C.E.G.R., Fernandes, R.B.A., Mendonça, B.A.F., Gjorup, D.F., Corrêa, G.R., Senra, E.O., 2016. Thermic and hydric dynamics of ironstone (Canga) and quartzite rupestrian grasslands in the Quadrilátero Ferrífero: the ecological importance of water, in:

*G.W. Fernandes et al. 2020 / Perspectives in Ecology and Conservation*

Fernandes, G.W. (Ed.), Ecology and Conservation of Mountaintop Grasslands in Brazil. Springer, Switzerland, pp. 71-85. [https://doi.org/10.1007/978-3-319-29808-5\\_4](https://doi.org/10.1007/978-3-319-29808-5_4)

Figueira, J.E.C., Ribeiro, K.T., Ribeiro, M.C., Jacobi, C.M., França, H., de Oliveira Neves, A.C., Conceição, A.A., Mourão, F.A., Souza, J.M., Miranda, C.A.K., 2016. Fire in rupestrian grasslands: plant response and management, in: Fernandes, G.W. (Ed.), Ecology and Conservation of Mountaintop Grasslands in Brazil. Springer, Switzerland, pp. 415-448. [https://doi.org/10.1007/978-3-319-29808-5\\_18](https://doi.org/10.1007/978-3-319-29808-5_18)

França, J.S., Solar, R., Hughes, R.M., Callisto, M., 2019. Student monitoring of the ecological quality of neotropical urban streams. *Ambio* 48, 867– 878. <https://doi.org/10.1007/s13280-018-1122-z>

Gavin, M.C., McCarter, J., Mead, A., Berkes, F., Stepp, J.R., Peterson, D., Tang, R., 2015. Defining biocultural approaches to conservation. *Trends Ecol. Evol.* 30, 140-145. <https://doi.org/10.1016/j.tree.2014.12.005>

Gomes, V.M., Negreiros, D., Carvalho, V., Fernandes, G.W., 2015. Growth and performance of rupestrian grasslands native species in quartzitic degraded areas. *Neotrop. Biol. Conserv.* 10, 159-68. <https://doi.org/10.4013/nbc.2015.103.06>

Giulietti, A.M., Pirani, J.R., 1988a. Patterns of geographic distribution of some plant species from the Espinhaço Range, Minas Gerais and Bahia, Brazil, in: Vanzolini P.E., Heyer W.R. (Ed.), Proceedings of a Workshop on Neotropical Distribution Patterns. Academia Brasileira de Ciências, Rio de Janeiro, pp. 39-69.

*G.W. Fernandes et al. 2020 / Perspectives in Ecology and Conservation*

- Giulietti, A.M., Pirani, J.R., Harley, R.M., 1997. Espinhaço range region, eastern Brazil, in: Davis S.D., Heywood V.H. (Ed.), *Centres of Plant Diversity: a Guide and Strategy for their Conservation*. IUCN Publication Unity, Cambridge, p. 397-404.
- Giulietti, N., Giulietti, A.M., Pirani, J.R., Menezes, N.L., 1988b. Estudos de sempre-vivas: importância econômica do extrativismo em Minas Gerais, Brasil. *Acta Bot. Bras.* 1, 179–194. <http://dx.doi.org/10.1590/S0102-33061987000300018>
- IBGE, Instituto Brasileiro de Geografia e Estatística, 2019. *Biomass e Sistema Costeiro-marinho do Brasil: Compatível com a Escala 1:250 000*. IBGE - Coordenação de Recursos Naturais e Estudos Ambientais, Rio de Janeiro.
- Jung M, et al. 2020. Areas of global importance of terrestrial biodiversity, carbon and water. *Bioarkiv* <https://doi.org/10.1101/2020.04.16.021444>
- Kuai, P., Yang, S., Tao, A., Khan, Z.D., 2019. Environmental effects of Chinese-style fiscal decentralization and the sustainability implications. *J. Clean. Prod.* 239, 1-13. <https://doi.org/10.1016/j.jclepro.2019.118089>
- Ladu, L., Imbert, E., Quitzow, R., Morone, P., 2020. The role of the policy mix in the transition toward a circular forest bioeconomy. *Forest Policy Econ.* 110, 1-17. <https://doi.org/10.1016/j.forpol.2019.05.023>
- Le Stradic, S., Buisson, E., Fernandes, G.W., Morellato, L.P.C., 2018. Reproductive phenology of two contrasting neotropical mountain grasslands. *Appl. Veg. Sci.* 29, 15-24. <http://doi.org/10.1111/jvs.12596>

*G.W. Fernandes et al. 2020 / Perspectives in Ecology and Conservation*

- Martinelli, G., Moraes, M.A., 2013. Livro vermelho da flora do Brasil. Instituto de Pesquisas Jardim Botânico do Rio de Janeiro. Centro Nacional de Conservação da Flora, Rio de Janeiro.
- Mattos, J.S., Camargo, M.G.G., Morellato, L.P.C., Batalha, M.A., 2019. Plant phylogenetic diversity of tropical mountaintop rocky grasslands: local and regional constraints. *Plant Ecol.* 220, 1119-1129. <https://doi.org/10.1007/s11258-019-00982-5>
- Messias, M.C.T.B, Leite, M.G.P, Meira-Neto, J.A.A, Kozovits, A.R., 2012. Fitossociologia de campos rupestres quartzíticos e ferruginosos no Quadrilátero Ferrífero, Minas Gerais. *Acta Bot. Bras.* 26, 230–242. <http://doi.org/10.1590/S0102-33062012000100022>
- Metzger, J.P., Bustamante, M.M., Ferreira, J., Fernandes, G.W., Librán-Embid, F., Pillar, V.D., Prist, P.R., Rodrigues, R.R., Vieira, I.C., Overbeck, G.E., 2019. Why Brazil needs its legal reserves. *Perspect. Ecol. Conserv.* 17, 91-103. <https://doi.org/10.1016/j.pecon.2019.07.002>
- Miola, D.T.B., Marinho, A.P., Dayrell, R.L.C., Silveira, F.A.O., 2019. Silent loss: misapplication of an environmental law compromises conservation in a Brazilian biodiversity hotspot. *Perspect. Ecol. Conserv.* 17, 84-89. <https://doi.org/10.1016/j.pecon.2019.04.001>
- Monteiro, L.M., Machado, N., Martins, E., Pougy, N., Verdi, M., Martinelli, G., Loyola, R.D., 2018. Conservation priorities for the threatened flora of mountaintop grasslands in Brazil. *Flora* 238, 234–243. <https://doi.org/10.1016/j.flora.2017.03.007>
- Morcatty, T.Q., El Bizri, H.R., Carneiro, H.C.S., Biasizzo, R.L., Alméri, C.R.O., Silva, E.S., Rodrigues, F.H.G., Figueira, J.E.C., 2013. Habitat loss and mammalian extinction patterns:

*G.W. Fernandes et al. 2020 / Perspectives in Ecology and Conservation*

are the reserves in the Quadrilátero Ferrífero, southeastern Brazil, effective in conserving mammals? *Ecol. Res.* 28, 935-947. <https://doi.org/10.1007/s11284-013-1076-3>

Morellato, L.P.C., Silveira, F.A.O., 2018. Plant life in campo rupestre: New lessons from an ancient biodiversity hotspot. *Flora* 238, 1-10. <https://doi.org/10.1016/j.flora.2017.12.001>

Mota, N.F.O., Watanabe, M.T.C., Zappi, D.C., Hiuri, A.L., Pallos, J., Viveiros, R.S., Giulietti, A.M., Viana, P., 2018. Amazon canga: the unique vegetation of Carajás revealed by the list of seed plants. *Rodriguesia* 69, 1435-1488. <http://dx.doi.org/10.1590/2175-7860201869336>

Negreiros, D., Le Stradic, S., Fernandes, G.W., Rennó, H.C., 2014. CSR analysis of plant functional types in highly diverse tropical grasslands of harsh environments. *Plant Ecol.* 215, 379-388. <https://doi.org/10.1007/s11258-014-0302-6e>

Neves, A.C.O., Barbieri, A.F., Pacheco, A.A., de Moura Resende, F., Braga, R.F., Azevedo, A.A., Fernandes, G.W., 2016. The human dimension in the Espinhaço Mountains: land conversion and ecosystem services, in: Fernandes, G.W. (Ed.), *Ecology and Conservation of Mountaintop Grasslands in Brazil*. Springer, Switzerland, pp. 501-530.  
[http://doi:10.1007 / 978-3-319-29808-5\\_21](http://doi:10.1007 / 978-3-319-29808-5_21)

Neves, D.M., Dexter, K.G., Pennington, T., Bueno, M.L., Miranda, P.L.S., Oliveira-Filho, A.T., 2018. Lack of floristic identity in campos rupestre - a hyperdiverse mosaic of rocky montane savannas in South America. *Flora*, 238, 24-31.  
<https://doi.org/10.1016/j.flora.2017.03.011>



*G.W. Fernandes et al. 2020 / Perspectives in Ecology and Conservation*

- Neves, F.S., da Silva, P.G., Solar, R., Nunes, C.A., Beirão, M.V., Brant, H., Castro, F.S., Dáttilo, W., Guevara, R., Fernandes, G.W., in press. Habitat generalists drive nestedness in a tropical mountaintop insect metacommunity. *Biol. J. Linn. Soc.*
- Oki, Y., Goto, B.T., Jobim, K., Rosa, L.H., Ferreira, M.C., Coutinho, E.S., Xavier, J.H. A., Carvalho, F., Moreira, F.M.S., Souza, F.A., Berbara, R.L.L., Fernandes, G.W., 2016. Arbuscular mycorrhiza and endophytic fungi in ruspestrian grasslands, in: Fernandes, G.W. (Ed.), *Ecology and Conservation of Mountaintop Grasslands in Brazil*. Springer, Switzerland, pp. 157-179. [http://doi.org/10.1007/978-3-319-29808-5\\_8](http://doi.org/10.1007/978-3-319-29808-5_8)
- Oliveira, R.S., Abrahão, A., Pereira, C., Teodoro, G.S., Brum, M., Alcantara, S., Lambers, H., 2016. Ecophysiology of campos rupestre's plants, in: Fernandes, G.W. (Ed.), *Ecology and Conservation of Mountaintop Grasslands in Brazil*. Springer, Switzerland, pp. 227-272. [http://doi:10.1007 / 978-3-319-29808-5\\_11](http://doi:10.1007 / 978-3-319-29808-5_11)
- Overbeck, G.E., Vélez-Martin, E., Scarano, F.R., Lewinsohn, T.M., Fonseca, C.R., Meyer, S.T., Müller, S.C., Ceotto, P., Dadalt, L., Durigan, G., Ganade, G., Gossner, M.N., Guadagnin, D.L., Lorenzen, K., Jacobi, C.M., Weisser, W.W., Pillar, V.D., 2015. Conservation in Brazil needs to include non-forest ecosystems. *Divers. Distrib.* 21, 1455-1466. <https://doi.org/10.1111/ddi.12380>
- Pacheco, A.A, Neves, A.C., Fernandes, G.W., 2018. Uneven conservation efforts compromise Brazil to meet the Target 11 of Convention on Biological Diversity. *Perspect. Ecol. Conserv.* 16, 43-48. <https://doi.org/10.1016/j.pecon.2017.12.001>

*G.W. Fernandes et al. 2020 / Perspectives in Ecology and Conservation*

Pascual, U., Balvanera, P., Díaz, S., Pataki, G., Roth, E., Stenseke, M., Watson, R.T., Dessane, E.B., Islar, M., Kelemen, E., Maris, V., Quaas, M., Subramanian, S.M., Wittmer, H., Adlan A., Ahn, S., Al-Hafedh, Y.S., Amankwah, E., Asah, S.T., Berry, P., Bilgin, A., Breslow, S.J., Bullock, C., Cáceres, D., Daly-Hassen, H., Figueroa, E., Golden, C.D., Gómez-Baggethun, E., González-Jiménez, D., Houdet, J., Keune, H., Kumar, R., Ma, K., May, P.H., Mead, A., O'Farrell, P., Pandit, R., Pengue, W., Pichis-Madruga, R., Popa, F., Preston, S., Pacheco-Balanza, D., Saarikoski, H., Strassburg, B.B., Belt, M.v.d., Verma, M., Wickson, F., Yagi, N., 2017. Valuing nature's contributions to people: the IPBES approach. *Curr. Opin. Environ. Sustain.* 26, 7-16.  
<https://doi.org/10.1016/j.cosust.2016.12.006>

Pena, J.C.C., Goulart, F., Fernandes, G.W., Hoffmann, D., Leite, F.S., dos Santos, N.B., Soares-Filho, B., Sobral-Souza, T., Vancine, M.H., Rodrigues, M., 2017. Impacts of mining activities on the potential geographic distribution of eastern Brazil mountaintop endemic species. *Perspect. Ecol. Conserv.* 15, 172-178. <https://doi.org/10.1016/j.pecon.2017.07.005>

Pougy, N., Verdi, M., Martins, E., Loyola, R., Martinelli, G., Rapini, A., Quinet, A., Marcato, A.C., Lima, A.M.S., Jack, A., Scatigna, A.V., Martins, A.B., Carneiro, A.C.G.S., Loeuille, B.F.P., Ferreira Júnior, C.A., Lima, C.M., Takeuchi, C., Jacobi, C.M., Maurenza, D., Zappi, D., Salviano, D.A., Dalcin, E., Costa, F.N., Hurbath, F., Wimmer, F., Fernandes, F.M. Toledo, F., Ávila, G.C., Fernandes, G.W., Ferreira, I.L., Prado, J., Nakajima, J.N., Oliveira, J.A., Rando, J.G., Lovo, J., Guimarães, L.C., Martins, L.G.M., Andrade, L.E., Bedê, L.C., Lima, L.G., Menini Neto, L., Devecchi, M.F., Santos, M.A., Fernandes, M.G.C., Jorge, M.R.U., Assis, M.C., Andrade, M.A., Roque, N., Mota, N.F.O., Machado, N., Bernardes, N., Ferreira, P.L., Sano, P.T., Fiaschi, P., Viana, P.L., Almeida, R.F.,

*G.W. Fernandes et al. 2020 / Perspectives in Ecology and Conservation*

- Forzza, R.C., Harley, R.M., Romero, R., Silva, S.R., Cavalcanti, T.B., Giorni, V.T., 2015. Plano de Ação Nacional para a conservação da flora ameaçada de extinção da Serra do Espinhaço Meridional. Instituto de Pesquisas Jardim Botânico do Rio de Janeiro. Centro Nacional de Conservação da Flora (CNCFlora): Andrea Jakobsson Estúdio, Rio de Janeiro.
- Ramos, E.K.S., Magalhães, R.F., Marques, N.C.S., Baêta, D., Garcia, P.C.A., Santos, F.R., 2019. Cryptic diversity in Brazilian endemic monkey frogs (Hylidae, Phyllomedusinae, Pithecopus) revealed by multispecies coalescent and integrative approaches. *Mol. Phylogenet. Evol.* 132, 105-116. <https://doi.org/10.1016/j.ympev.2018.11.022>
- Resende, F., Fernandes, G.W., Andrade, D.C., Néder, H.D., 2017. Economic valuation of the ecosystem services provided by a protected area in the Brazilian Cerrado: application of the contingent valuation method. *Braz. J. Biol.* 77, 762-773. <http://doi.org/10.1590/1519-6984.21215>
- Resende, F.M., Fernandes, G.W., Coelho, M.S., 2013. Economic valuation of plant diversity storage service provided by Brazilian rupestrian grassland ecosystems. *Braz. J. Biol.* 73, 709-716. <http://dx.doi.org/10.1590/S1519-69842013000400005>
- Ribas, R.P., Caetano, R.M., Gontijo, B.M., de Azevedo Xavier, J.H., 2016. Afforestation in the rupestrian grasslands: the augmenting pressure of Eucalyptus, in: Fernandes, G.W. (Ed.), *Ecology and Conservation of Mountaintop Grasslands in Brazil*. Springer, Switzerland, pp. 395-414. [http://doi:10.1007/978-3-319-29808-5\\_17](http://doi:10.1007/978-3-319-29808-5_17)

*G.W. Fernandes et al. 2020 / Perspectives in Ecology and Conservation*

- Rodrigues, E.L., Jacobi, C.M., Figueira, J.E.C., 2019. Wildfires and their impact on the water supply of a large neotropical metropolis: A simulation approach. *Sci. Total Environ.* 651, 1261-1271. <http://doi.org/10.1016/j.scitotenv.2018.09.289>
- Schaefer C.E., Cândido H.G., Corrêa G.R., Nunes J.A., Arruda D.M., 2016. Soils associated with rupestrian grasslands, in: Fernandes, G.W. (Ed.), *Ecology and Conservation of Mountaintop Grasslands in Brazil*. Springer, Switzerland, pp. 55-69. [https://doi.org/10.1007/978-3-319-29808-5\\_3](https://doi.org/10.1007/978-3-319-29808-5_3)
- Silveira, F.A.O., Barbosa, M., Beiroz, W., Callisto, M., Macedo, D.R., Morellato, L.P.C., Neves, F.S., Nunes, Y.R.F., Solar, R.R., Fernandes, G.W., 2019. Tropical mountains as natural laboratories to study global changes: a long-term ecological research project in a megadiverse biodiversity hotspot. *Perspect. Plant Ecol. Evol. Syst.* 38, 64-73. <https://doi.org/10.1016/j.ppees.2019.04.001>
- Silveira, F.A.O., Negreiros, D., Barbosa, N.P.U., Buisson, E., Carmo, F.F., Carstensen, D.W., Conceição, A.A., Cornelissen, T.G., Echternacht, L., Fernandes, G.W., Garcia, Q.S., Guerra, T.J, Jacobi, C.M, Lemos-Filho, J.P., Le Stradic, S., Morellato, L.P.C., Neves, F.S., Oliveira, R.S., Schaefer, C.E., Viana, P.L., Lambers, H., 2016. Ecology and evolution of plant diversity in the endangered campo rupestre: a neglected conservation priority. *Plant Soil* 403, 129–152. <https://doi.org/10.1007/s11104-015-2637-8>
- Sonter, L.J., Barrett, D.J., Soares-Filho, B.S., 2014. Offsetting the impacts of mining to achieve no net loss of native vegetation. *Conserv. Biol.* 28, 1068-1076. <http://doi:10.1111/cobi.12260>

*G.W. Fernandes et al. 2020 / Perspectives in Ecology and Conservation*

Sukhdev, P., 2008. The Economics of Ecosystems & Biodiversity: an interim report. European Union Commission for the Environment, Brüssel, European Community

Vasconcelos, M.F., 2011. O que são campos rupestres e campos de altitude nos topos de montanha do leste do Brasil? *Rev. Bras. Bot.* 34, 241–246.  
<http://dx.doi.org/10.1590/S0100-84042011000200012>

Vasconcelos, T.N.C., Alcantara, S., Andrino, C.O., Forest, F., Reginato, M., Simon, M.F., Pirani, J.R., 2020. Fast diversification through a mosaic of evolutionary histories characterizes the endemic flora of ancient Neotropical mountains. *Proc. R. Soc. B.* 287, 1-10.  
<http://doi.org/10.1098/rspb.2019.2933>

Veldman, J.W., Overbeck, G.E., Negreiros, D., Mahy, G., Le Stradic, S., Fernandes, G.W., Durigan, G., Buisson, E., Putz, F.E., Bond, W.J., 2015. Where tree planting and forest expansion are bad for biodiversity and ecosystem services. *Bioscience* 65, 1011–1018.  
<https://doi.org/10.1093/biosci/biv118>

Zappi, D.C, Moro, M.F., Walker, B., Meagher, T., Viana, P.L., Mota, N.F.O., Watanabe, M.T.C., Nic Lughadha E., 2019. Plotting a future for Amazonian canga vegetation in a campo rupestre context. *PLoS ONE* 14, 1-19. <https://doi.org/10.1371/journal.pone.0219753>
